# Supplementary material for: Differences in instantaneous water use efficiency derived from post-carboxylation fractionation respond to the interaction of CO 2 concentrations and water stress in semi-arid areas
Source: Copernicus journal article supplement (doi:10.5194/bg-2016-372), 2016-09-07
Supplement: Supplementary file [file bg-2016-372-AC1-supplement.zip]

# The interaction of CO<sub>2</sub> concentrations and water stress in semi-arid areas causes diverging response in instantaneous water use efficiency and carbon isotope composition

Na Zhao<sup>1</sup>, Ping Meng<sup>2</sup>, Yabing He<sup>1</sup>, Xinxiao Yu<sup>1\*</sup>

<sup>1</sup> College of soil and water conservation, Beijing Forestry University, Beijing 100083, P.R. China

<sup>2</sup> Research Institute of Forestry, Chinese Academy of Forestry 100091, Beijing, P.R. China

**Abstract.** In the context of global warming attributable to the increasing levels of CO<sub>2</sub>, severe drought can be anticipated in areas with chronic water shortages (semi-arid areas), which necessitates research on the interaction between elevated atmospheric concentrations of CO<sub>2</sub> and drought on plant photosynthetic discrimination. The <sup>13</sup>C fractionation may be generated through the transformation from photosynthate to sugars before transporting them outward the leaf. The influence of environmental conditions (i. e. CO<sub>2</sub> concentration and water stress) and their interactions on this fractionation have not yet been identified. Therefore, saplings of species typical to a semi-arid area of Northern China that have similar growth status—*Platycladus orientalis* and *Quercus variabilis*—were selected and cultivated in growth chambers with orthogonal treatments (four CO<sub>2</sub> concentrations [CO<sub>2</sub>] × five soil volumetric water contents (SWC)). The δ<sup>13</sup>C of water-soluble compounds extracted from leaves of potted saplings was measured to determine the instantaneous water use efficiency (WUE<sub>cp</sub>) after cultivation. Instantaneous water use efficiency derived from gas exchange (WUE<sub>ge</sub>) was integrated to estimate differences in δ<sup>13</sup>C signal variation before leaf-exported translocation of primary assimilates. The WUE<sub>ge</sub> of the two saplings both decreased with increased soil moisture, and increased with elevated [CO<sub>2</sub>] at 35%–80% of Field Capacity (FC) by strengthening photosynthetic capacity and reducing transpiration. Differences in instantaneous water use efficiency (iWUE) according to distinct environmental changes differed between the species. The WUE<sub>ge</sub> of *P. orientalis* was significantly greater than that of *Q. variabilis*, while the opposite results were obtained in a comparison of the WUE<sub>cp</sub> of the two species. Total <sup>13</sup>C fractionation from the site of carboxylation to cytoplasm before sugars transportation (total <sup>13</sup>C fractionation) was clearly species-specific, as demonstrated in the interaction of [CO<sub>2</sub>] and SWC. Rising [CO<sub>2</sub>] coupled with moistened soil generated increasing disparities of δ<sup>13</sup>C between the water soluble compounds (δ<sup>13</sup>C<sub>WSC</sub>) and estimated by gas-exchange observation (δ<sup>13</sup>C<sub>obs</sub>) in *P. orientalis* with an amplitude of 0.0328‰–0.0472‰. Further, the differences between δ<sup>13</sup>C<sub>WSC</sub> and δ<sup>13</sup>C<sub>obs</sub> of *Q. variabilis* increased as CO<sub>2</sub> concentration increased and water stress alleviated (0.0384‰–0.0466‰). Fractionations from mesophyll conductance and post-photosynthesis both contributed to the total <sup>13</sup>C fractionation determined by two measurements (1.06%–24.94% and 75.30%–98.9% of total <sup>13</sup>C fractionation, respectively). Total <sup>13</sup>C fractionations were linearly dependent on g<sub>s</sub>, indicating post-carboxylation fractionation was attributed to environmental variation. Thus, cautious descriptions of the magnitude and environmental dependence of apparent post-carboxylation fractionation are worth our attention in photosynthetic fractionation.

**Key words:** Post-carboxylation fractionation; Carbon isotope fractionation; Elevated CO<sub>2</sub> concentration; Soil volumetric water content; Instantaneous water use efficiency

## 1 Introduction

Since the onset of the industrial revolution, the atmospheric CO<sub>2</sub> concentration has increased at an annual rate of 0.4%, and is expected to increase further to 700 μmol·mol<sup>-1</sup>, together with more frequent periods of low water availability (IPCC, 2014). Increasing atmospheric CO<sub>2</sub> concentrations that trigger an ongoing greenhouse effect will not only lead to fluctuations in global patterns of precipitation, but also will amplify drought in arid regions, and lead to more frequent occurrences of extreme drought events in humid regions (Lobell et al., 2014). Accompanying the increasing concentration of CO<sub>2</sub>, the mean δ<sup>13</sup>C of atmospheric CO<sub>2</sub> is depleted by 0.02‰–0.03‰ year<sup>-1</sup> (data available from the CU-INSTAAR/NOAACMDL network for atmospheric CO<sub>2</sub>; <http://www.esrl.noaa.gov/gmd/>).

The carbon isotopic composition determined recently could respond more subtly to environmental changes and their influences on diffusion via plant physiology and metabolic processes (Gessler et al., 2014; Streit et al., 2013). While the depletion of δ<sup>13</sup>C<sub>CO<sub>2</sub></sub> has been shown in the atmosphere, variations in CO<sub>2</sub> concentration itself also might affect the δ<sup>13</sup>C of plant organs that, in turn, respond physiologically to climatic change (Gessler et al., 2014). The carbon discrimination (<sup>13</sup>Δ) of leaves could also provide timely feedback about the availability of soil moisture and the atmospheric vapor pressure deficit (Cernusak et al., 2012). Discrimination against <sup>13</sup>C in leaves relies mainly on environmental factors that affect the ratio of intercellular to ambient CO<sub>2</sub> concentration (*C<sub>i</sub>/C<sub>a</sub>*) and Rubisco activities, **even the mesophyll conductance derived from the difference of CO<sub>2</sub> concentrations between intercellular site and chloroplast** (Farquhar et al., 1982; Cano et al., 2014). As changes in environmental conditions affect photosynthetic discrimination, they are expected to be recorded differentially in the δ<sup>13</sup>C of water-soluble organic matter (δ<sup>13</sup>C<sub>WSOM</sub>) of the different plant organs. Meanwhile, several processes during photosynthesis alter the δ<sup>13</sup>C of carbon transported within plants considerably. Carbon-fractionation during photosynthetic CO<sub>2</sub> fixation has been described and reviewed well elsewhere (Farquhar et al., 1982; Farquhar and Sharkey, 1982).

Post-photosynthetic fractionation is derived from equilibrium and kinetic isotopic effects, which determines isotopic differences between metabolites and intramolecular reaction positions, **defined as “post-photosynthetic” or “post-carboxylation” fractionation** (Jäggi et al., 2002; Badeck et al., 2005; Gessler et al., 2008). Post-carboxylation fractionation in plants includes the carbon discriminations that follow carboxylation of ribulose-1, 5-bisphosphate, and internal diffusion (RuBP, 27‰), as well as related transitory starch metabolism (Gessler et al., 2008; Gessler et al., 2014), fractionation in leaves, fractionation-associated phloem transport, the remobilization or storage of soluble carbohydrates, and starch metabolism fractionations in sink tissue (tree rings). **In the synthesis of soluble sugars, <sup>13</sup>C-depletions of triose phosphates occur during exportation from the cytoplasm, and during production of fructose-1, as does 6-bisphosphate by aldolase in transitory starch synthesis (Rossmann et al., 1991; Gleixner and Schmidt, 1997). Synthesis of sugars before transportation to the twig is associated with the post-carboxylation fractionation generated in leaves. Although these are likely to play a role, what should be also considered is the CO<sub>2</sub> concentration in the chloroplast (*C<sub>c</sub>*), not in the intercellular space, as used in the simplified equation of the Farquhar’s model (Evans et al., 1986; Farquhar et al., 1989) is actually defined as carbon isotope discrimination (δ<sup>13</sup>C). Indeed, the difference between gas-exchange derived values and online measurements of δ<sup>13</sup>C has been widely used to estimate *C<sub>i</sub>-C<sub>c</sub>* and mesophyll conductance for CO<sub>2</sub> (Le Roux et al., 2001; Warren and Adams, 2006; Flexas et al., 2006; Evans et al., 2009; Flexas et al., 2012; Evans and von Caemmerer 2013). In this regard, changes in mesophyll conductance could be partly responsible for the differences from two measurements, as it generally**

increases in the short term in response to elevated CO<sub>2</sub> (Flexas et al., 2014), whereas it tends to decrease under drought (Hommel et al., 2014; Thérault-Rancourt et al., 2014). Therefore, it is necessary to avoid confusion of carbon isotope discrimination derived from synthesis of soluble sugars or/and mesophyll conductance, and further, whether and what magnitude of these carbon fractionations are related to environmental variation have not yet been investigated.

The simultaneous isotopic analysis of leaves is a recent refinement in isotope studies that allows us to determine the temporal variation in isotopic fractionation (Rinne et al., 2016), and will help decipher environmental conditions more reliably. Newly assimilated carbohydrates can be extracted, and are defined as the water-soluble compounds (WSCs) in leaves (Brandes et al., 2006; Gessler et al., 2009), which also can be associated with an assimilation-weighted average of  $C_i/C_a$  (and  $C_d/C_a$ ) photosynthesized over a period ranging from a few hours to 1-2 d (Pons et al., 2009). However, there is dispute whether the fractionation stemmed from post-carboxylation or/and mesophyll resistance may alter the stable signatures of leaf carbon and thence influence instantaneous water use efficiency (iWUE). In addition, the way in which the iWUE derived from these isotopic fractionations responds to different environmental factors, such as elevated [CO<sub>2</sub>] and/or soil water gradients, have not yet been observed.

Consequently, we investigated the  $\delta^{13}\text{C}$  of the fast-turnover carbohydrate pool in leaves from saplings of two trees typical in semi-arid areas of China—*Platycladus orientalis* and *Quercus variabilis*—together with simultaneous gas exchange measurements in control-environment of growth chambers (FH-230). Our goals are to differentiate the  $^{13}\text{C}$  fractionation from the site of carboxylation to cytoplasm before sugars transportation (total  $^{13}\text{C}$  fractionation) of *P. orientalis* and *Q. variabilis*, which were determined from the  $\delta^{13}\text{C}$  of water-soluble compounds and gas-exchange measurements, and then to discuss the potential causes for the observed divergence, estimate the contributions of post-photosynthetic and mesophyll resistance on these differences, and describe how these carbon isotopic fractionations respond to the interactive effects of elevated [CO<sub>2</sub>] and water stress.

## 2 Material and Methods

### 2.1 Study site and design

Saplings of *P. orientalis* and *Quercus variabilis* were selected as experimental material from the Capital Circle forest ecosystem station, a part of the Chinese Forest Ecosystem Research Network (CFERN, 40°03'45"N, 116°5'45"E) in Beijing, China. This region is populated by warm, temperate, deciduous, broad-leaved trees and mixed tree communities dominated by *Quercus variabilis* Bl. and *Platycladus orientalis* (L.) Franco, respectively. Saplings have similar ground diameters, heights, and growth statuses. The saplings were placed in pots 22 cm in diameter and 22 cm in height. Undisturbed soil samples were collected from the field in the research region, and the sieved soil (with all particles <10 mm removed) was placed in the pots. A single *P. orientalis* sapling was transplanted into each pot. The soil bulk density in the pots was maintained at 1.337–1.447 g cm<sup>-3</sup>. After one month of rejuvenation, the potted saplings were placed into chambers for cultivation.

The controlled experimental treatments were conducted in growth chambers (FH-230, Taiwan Hipoint Corporation, Kaohsiung City, Taiwan). To imitate the meteorological factors of the growth seasons in the research region, the daytime temperature in the chambers was set to 25 ± 0.5°C from 07:00 to 17:00, and the night-time temperature was 18 ± 0.5°C from 17:00 to 07:00. Relative humidity was maintained at 60% and 80% during the day and night, respectively. The light system was activated in the daytime and shut down at night. The average daytime light intensity was maintained at 200–240 μmol m<sup>-2</sup> s<sup>-1</sup>.

CO<sub>2</sub> concentration was controlled by the central controlling system of the chambers (FH-230). Two growth chambers (A and B) were used in our study. Chamber A was switched in turn to maintain a CO<sub>2</sub> concentration of 400 ± 50 ppm (during June 2–9, June 12–19, June 21–28, and July 2–9, 2015) and 500 ± 50 ppm (during July 11–18, July 22–29, August 4–11, and August 15–22, 2015). The other was adjusted to maintain the CO<sub>2</sub> concentration at 600 ± 50 ppm (during June 2–9, June 12–19, June 21–28, and July 2–9, 2015) and 800 ± 50 ppm (during July 11–18, July 22–29, August 4–11, and August 15–22, 2015). The CO<sub>2</sub> concentration in the chambers was set to maintain one target level (permitting a standard deviation of ± 50 ppm) during cultivation. Thus, we employed a gradient of four CO<sub>2</sub> concentrations in our study (400 ± 50 ppm, 500 ± 50 ppm, 600 ± 50 ppm, and 800 ± 50 ppm). Detectors inside the chambers monitored and maintained the CO<sub>2</sub> concentrations continuously at the constant setting.

We designed a device to water the potted plants automatically to avoid heterogeneity caused by interruptions in the watering process (Fig. 1). It consisted of the water storage tank, holder, controller, soil moisture sensors, and drip irrigation components. Prior to use, the water tank was filled with water, and the soil moisture sensor was inserted to a uniform depth in the soil. After connecting the controller to an AC power supply, specific soil water could be set. The soil volumetric water content (SWC) of the pot soil was monitored by the soil moisture sensors. Through the sensors, the chamber could determine whether to water or stop watering the plants. Two drip irrigation devices were installed in both chambers, respectively. After measuring the average Field Capacity (FC) of the pot soil (30.70%), five levels of SWC were maintained before the orthogonal tests, as follows: 100% FC (or CK) (SWC approximately 27.63%–30.70%), 70%–80% of FC (SWC approximately 21.49%–24.56%), 60%–70% of FC (SWC approximately 18.42%–21.49%), 50%–60% of FC (SWC approximately 15.35%–18.42%), and 35%–45% of FC (SWC approximately 10.74%–13.81%). Each level of soil water was kept within the specific range thereafter by the irrigation device.

After establishing the equilibrium circumstances of elevated CO<sub>2</sub> across the soil water gradients, the saplings were ready for investigation. Each orthogonal treatment included three replicates, and each replicate continued for 7 days. Pots were rearranged periodically to minimize non-uniform illumination.

Orthogonal tests: elevated CO<sub>2</sub> concentration gradient presented as 400 ppm, 500 ppm, 600 ppm, and 800 ppm, combined with a soil-water gradient 35%–45% of FC, 50%–60% of FC, 60%–70% of FC, and 70%–80% of FC and 100% FC (CK).

## 2.2 Foliar gas exchange measurement

Fully expanded primary annual leaves of the saplings were measured with a portable infrared gas photosynthesis system (LI-6400, Li-Cor, Lincoln, US) before and after the 7-day cultivation in the chambers. **Four replicates were measured with each leaf and four leaves were chosen per tree in the gas-exchange measurement. There were two saplings ready for one orthogonal treatment ([CO<sub>2</sub>] × water stress).** The main photosynthetic parameters, such as net photosynthetic rate ( $P_n$ ) and transpiration rate ( $T_r$ ), were measured. Based on the theories proposed by Von Caemmerer and Farquhar (1981), stomatal conductance ( $g_s$ ) and intercellular CO<sub>2</sub> concentration ( $C_i$ ) were calculated by the Li-Cor software. Each leaf was measured three times. Three leaves from each sapling were chosen, and three saplings were measured within one orthogonal treatment. Instantaneous water use efficiency via gas exchange (WUE<sub>ge</sub>) was calculated as the ratio of  $P_n$  to  $E$ .

## 2.3 Plant material collection and leaf water soluble compounds extraction

**After gas exchange measurements, recently-expanded, eight sun leaves were removed per tree of two species and two cultivated saplings per specie were replicated per treatment, and then were frozen**

immediately in liquid nitrogen. A protocol adapted from Gessler et al. (2004) was used to extract the water-soluble compounds (WSCs). All samples were ground to fine powders using mortars and liquid nitrogen. 50 mg of ground leaves and 100 mg PVPP (polyvinylpolypyrrolidone) were weighed, mixed evenly, and incubated in 1 mL double demineralized water for 60 min at 5 °C in a centrifuge tube. Then, the tubes were heated in 100 °C water for 3 min. After they cooled to room temperature, the supernatant was centrifuged at 12000 xg for 5 min and transferred 10 µL supernatant into tin capsule to be dried at 70 °C. Folded capsules were then ready for  $\delta^{13}\text{C}$  analysis of WSOM.

The samples of WSCs from leaves were combusted in an elemental analyzer (EuroEA, HEKAtech GmbH, Wegberg, Germany) and analyzed in the mass spectrometer (DELTA<sup>plus</sup>XP, ThermoFinnigan). Carbon isotope signatures are expressed in  $\delta$ -notation in parts per thousand, relative to the international Pee Dee Belemnite (PDB):

$$\delta^{13}\text{C} = \left( \frac{R_{\text{sample}}}{R_{\text{standard}}} - 1 \right) \times 1000 \quad (1)$$

where  $\delta^{13}\text{C}$  is the heavy isotope and  $R_{\text{sample}}$  and  $R_{\text{standard}}$  refer to the isotope ratio between the particular substance and the corresponding standard, respectively. The precision of the repeated measurements was 0.1 ‰.

## 2.4 Isotopic calculation

### 2.4.1 $^{13}\text{C}$ fractionation from the site of carboxylation to cytoplasm before sugars transportation

Based on the linear model developed by Farquhar and Sharkey (1982), the isotope discrimination factor,  $\Delta$ , was calculated as:

$$\Delta = (^{13}\text{C}_a - ^{13}\text{C}_p) / (1 + ^{13}\text{C}_p) \quad (2)$$

where  $^{13}\text{C}_a$  is the isotope signature of ambient  $[\text{CO}_2]$  in the chamber;  $^{13}\text{C}_p$  is the  $^{13}\text{C} : ^{12}\text{C}$  of the water-soluble compounds extracted from foliage. The  $C_i : C_a$  is determined by:

$$C_i : C_a = (\Delta - a) / (b - a) \quad (3)$$

where  $C_i$  is the intercellular  $\text{CO}_2$  concentration, and  $C_a$  is the ambient  $\text{CO}_2$  concentration in the chamber;  $a$  is the discrimination dependent on a fraction factor (4‰).  $b$  is the discrimination during  $\text{CO}_2$  fixation by ribulose 1,5- biphosphate carboxylase/oxygenase (Rubisco) and internal diffusion (30‰). Instantaneous water use efficiency by gas-exchange measurements ( $\text{WUE}_{ge}$ ) is calculated as:

$$\text{WUE}_{ge} = P_n : T_r = (C_a - C_i) / 1.6\Delta e \quad (4)$$

where  $P_n$  is the net carbon assimilation,  $T_r$  is the molar rate of transpiration, and 1.6 is the diffusion ratio of stomatal conductance to water vapor to  $\text{CO}_2$  in the chamber.  $\Delta e$  is the difference in water vapor pressure between the intracellular in leaves and ambient air, which may be calculated as:

$$\Delta e = e_{lf} - e_{atm} = 0.611 \times e^{17.502T/(240.97+T)} \times (1 - \text{RH}) \quad (5)$$

where  $e_{lf}$  and  $e_{atm}$  represent the extra- and intra-cellular water vapor pressure, respectively.  $T$  and RH is temperature and relative humidity on leaf surface. The instantaneous water use efficiency could be determined by the  $\delta^{13}\text{C}_{WSC}$  of leaves of two species, defined as  $\text{WUE}_{cp}$ :

$$\text{WUE}_{cp} = \frac{P_n}{T_r} = (1 - \varphi) (C_a - C_i) / 1.6\Delta e = C_a (1 - \varphi) \left[ \frac{b - \delta^{13}\text{C}_a + (b+1)\delta^{13}\text{C}_{WSC}}{(b-a)(1 + \delta^{13}\text{C}_{WSC})} \right] / 1.6\Delta e \quad (6)$$

$\varphi$  is the ratio between carbohydrates consumed during respiration of the leaves and that of other organs at night (0.3).  $\delta^{13}\text{C}_{WSC}$  is the carbon isotopic composition of water soluble compounds extracted from leaves.

Then the  $^{13}\text{C}$  fractionation from the site of carboxylation to cytoplasm before sugars transportation (total  $^{13}\text{C}$  fractionation) can be estimated by the observed  $\delta^{13}\text{C}$  of water soluble compounds from leaves ( $\delta^{13}\text{C}_{\text{WSC}}$ ) and the modeled  $\delta^{13}\text{C}$  calculated from gas-exchange ( $\delta^{13}\text{C}_{\text{model}}$ ). The  $\delta^{13}\text{C}_{\text{model}}$  can be calculated from  $\Delta_{\text{model}}$  from Eqn. (2). The  $\Delta_{\text{model}}$  can be determined by Eqns. (3 and 4) as:

$$\Delta_{\text{model}} = (b - a) \left( 1 - \frac{1.6\Delta e \text{WUE}_{ge}}{C_a} \right) + a \quad (7)$$

$$\delta^{13}\text{C}_{\text{model}} = \frac{C_a - \Delta_{\text{model}}}{1 + \Delta_{\text{model}}} \quad (8)$$

$$\text{Total } ^{13}\text{C fractionation} = \delta^{13}\text{C}_{\text{WSC}} - \delta^{13}\text{C}_{\text{model}} \quad (9)$$

#### 2.4.2 Methodology of calculating mesophyll conductance

Actually, the carbon isotope discrimination is generated from the relative contribution of diffusion and carboxylation, reflected by the ratio of  $\text{CO}_2$  concentration at the site of carboxylation ( $C_c$ ) to that in the ambient environment surrounding plants ( $C_a$ ). The carbon isotopic discrimination ( $\Delta$ ) could be presented as (Farquhar et al. 1982):

$$\Delta = a_b \frac{C_a - C_s}{C_a} + a \frac{C_s - C_i}{C_a} + (e_s + a_l) \frac{C_i - C_c}{C_a} + b \frac{C_c}{C_a} - \frac{eR_D + f\Gamma^*}{C_a} \quad (10)$$

where  $C_a$ ,  $C_s$ ,  $C_i$ , and  $C_c$  indicate the  $\text{CO}_2$  concentrations in the ambient environment, at the boundary layer of leaf, in the intercellular air spaces before entrancing into solution, and at the sites of carboxylation, respectively;  $a_b$  is the fractionation for the  $\text{CO}_2$  diffusion at the boundary layer (2.9‰);  $a$  is the fractionation occurring  $\text{CO}_2$  diffusion in still air (4‰);  $e_s$  is the discrimination of  $\text{CO}_2$  diffusion when  $\text{CO}_2$  enters in solution (1.1‰, at 25 °C);  $a_l$  is the fractionation derived from diffusion in the liquid phase (0.7‰);  $b$  is the carboxylation discrimination in C3 plants (27‰);  $e$  and  $f$  are carbon discrimination derived in dark respiration ( $R_D$ ) and photorespiration, respectively.  $k$  is the carboxylation efficiency, and  $\Gamma^*$  is the  $\text{CO}_2$  compensation point in the absence of dark respiration (Brooks and Farquhar, 1985).

When the gas in the cuvette could be well stirred during measurements of carbon isotopic discrimination and gas exchange, the diffusion in the boundary layer could be neglected and Equation 7 could be shown:

$$\Delta = a \frac{C_a - C_i}{C_a} + (e_s + a_l) \frac{C_i - C_c}{C_a} + b \frac{C_c}{C_a} - \frac{eR_D + f\Gamma^*}{C_a} \quad (11)$$

There is no agreement about the value of  $e$ , although recent measurements estimated it as 0-4‰. Value of  $f$  has been estimated ranging at 8-12‰ (Gillon and Griffiths, 1997; Igamberdiev et al., 2004; Lanigan et al., 2008). As the most direct factor, the value of  $b$  will influence the calculation for  $g_m$ , has been thought to be close to 30‰ in higher plants (Guy et al., 1993).

The difference of  $\text{CO}_2$  concentration between the substomatal cavities and the chloroplast is omitted while diffusion discrimination related with dark-respiration and photorespiration is also negligible, the Equation 8 could be simplified as:

$$\Delta_i = a + (b - a) \frac{C_i}{C_a} \quad (12)$$

Equation 12 presents the linear relationship between carbon discrimination and  $C_i/C_a$  that used normally in carbon isotopic fractionation. That underlined the subsequent comparison between the expected  $\Delta$  (originated from gas-exchange,  $\Delta_i$ ) and those actually measured ( $\Delta_{\text{obs}}$ ), which could evaluate the magnitude of differences of  $\text{CO}_2$  concentration between the intercellular air and the sites of carboxylation that generated by mesophyll resistance. Consequently,  $g_m$  can be estimated by performing the  $\Delta_{\text{obs}}$  by isotope ratio mass spectrometry and expected  $\Delta_i$  from  $C_i/C_a$  by gas exchange



measurements.

Then subtract  $\Delta_{obs}$  of Equation 11 from  $\Delta_i$  calculated by Equation 12:

$$\Delta_i - \Delta_{obs} = (b - e_s - a_l) \frac{C_i - C_c}{C_a} + \frac{\frac{eR_D}{k} + f\Gamma^*}{C_a} \quad (13)$$

and the net assimilation rate ( $A_n$ ) from the first Fick's law is presented by:

$$A_n = g_m(C_i - C_c) \quad (14)$$

Substitute Equation 14 into Equation 13 we obtain:

$$\Delta_i - \Delta_{obs} = (b - e_s - a_l) \frac{A_n}{g_m C_a} + \frac{\frac{eR_D}{k} + f\Gamma^*}{C_a} \quad (15)$$

$$g_m = \frac{(b - e_s - a_l) \frac{A_n}{C_a}}{(\Delta_i - \Delta_{obs}) - \frac{eR_D/k + f\Gamma^*}{C_a}} \quad (16)$$

In calculation of  $g_m$ , the respiratory and photorespiratory terms could be ignored or be given the specific constant values. Here,  $e$  and  $f$  are assumed to be zero or be cancelled out in the calculation of  $g_m$ .

Then Equation 16 can be transformed into:

$$g_m = \frac{(b - e_s - a_l) \frac{A_n}{C_a}}{\Delta_i - \Delta_{obs}} \quad (17)$$

### 3 Results

#### 3.1 Foliar gas exchange measurements

*P. orientalis* and *Q. variabilis* saplings were exposed to the orthogonal treatments (under gradients of SWC and  $[\text{CO}_2]$  of 400 ppm, 500 ppm, 600 ppm, and 800 ppm, labeled as  $C_{400}$ ,  $C_{500}$ ,  $C_{600}$ , and  $C_{800}$ ). When SWC increased,  $P_n$ ,  $g_s$  and  $T_r$  in *P. orientalis* and *Q. variabilis* peaked at 70%–80% of FC or/and FC (Fig. 2). The  $C_i$  in *P. orientalis* rose as SWC increased, while it peaked at 60%–70% of FC and declined thereafter with increased SWC in *Q. variabilis*. The uptake capacity of carbon and  $C_i$  were elevated significantly by elevated  $[\text{CO}_2]$  at any given SWC for two species ( $p < 0.05$ ). Further, greater increasing magnitudes of  $P_n$  in *P. orientalis* were found at 50%–70% of FC from  $C_{400}$  to  $C_{800}$ , which was at 35%–45% of FC in *Q. variabilis*. As the water stress was alleviated (at 70%–80% of FC and FC), the reduction of  $g_s$  in *P. orientalis* was more pronounced with elevated  $[\text{CO}_2]$  at a given SWC ( $p < 0.01$ ). Nevertheless,  $g_s$  of *Q. variabilis* in  $C_{400}$ ,  $C_{500}$ , and  $C_{600}$  was significantly higher than that in  $C_{800}$  at 50%–80% of FC ( $p < 0.01$ ). Coordinated with  $g_s$ ,  $T_r$  of two species in  $C_{400}$  and  $C_{500}$  was significantly higher than that in  $C_{600}$  and  $C_{800}$  except for 35%–60% of FC ( $p < 0.01$ , Figs. 2g and 2h). Larger  $P_n$ ,  $g_s$ ,  $C_i$  and  $T_r$  of *Q. variabilis* was significantly presented than that of *P. orientalis* ( $p < 0.01$ , Fig. 2).

#### 3.2 $\delta^{13}\text{C}$ of water-soluble compounds in leaves

To observe the photosynthetic traits of the two saplings, the same leaf was frozen immediately and the water-soluble compounds (WSCs) were extracted for all orthogonal treatments.  $\delta^{13}\text{C}_{\text{WSC}}$  ( $\delta^{13}\text{C}$  of water-soluble compounds from leaves) of two species both increased as soil moisture improved (Figs. 3a and 3b,  $p < 0.01$ ). The average ( $\pm \text{SD}$ )  $\delta^{13}\text{C}_{\text{WSC}}$  of *P. orientalis* and *Q. variabilis* ranged from  $-27.44 \pm 0.155\text{‰}$  to  $-26.71 \pm 0.133\text{‰}$ , and from  $-27.96 \pm 0.129\text{‰}$  to  $-26.49 \pm 0.236\text{‰}$ , respectively. Similarly with the photosynthetic capacity varying with increased SWC, average  $\delta^{13}\text{C}_{\text{WSC}}$  of two saplings reached their maximums at 70%–80% of FC. Together with the gradual enrichment of  $[\text{CO}_2]$ , average  $\delta^{13}\text{C}_{\text{WSC}}$  in two species declined while  $[\text{CO}_2]$  exceeded 600 ppm ( $p < 0.01$ ). Except for  $C_{400}$  at 50%–100% of FC,  $\delta^{13}\text{C}_{\text{WSC}}$  of *P. orientalis* was significantly larger than that of *Q. variabilis* in any  $[\text{CO}_2] \times \text{SWC}$  treatment ( $p < 0.01$ ,

Fig. 3).

### 3.3 Estimations of $WUE_{ge}$ and $WUE_{cp}$

Instantaneous water use efficiency via gas exchange ( $WUE_{ge}$ ) is calculated as  $P_n$  divided by  $T_r$ . Figure 4a shows that **incremental** magnitudes of  $WUE_{ge}$  in *P. orientalis* under severe drought (i.e., 35%–45% of FC) were highest at any given  $[CO_2]$ , ranging from 90.70% to 564.65%.  **$WUE_{ge}$  in *P. orientalis* reduced as SWC increased, while they increased remarkably as  $[CO_2]$  elevated.** Compared to *P. orientalis*, trends of  $WUE_{ge}$  in *Q. variabilis* were promoted slightly at FC in  $C_{600}$  or  $C_{800}$  as **soil moistened** (Fig. 4b). The maximum of  $WUE_{ge}$  thus occurred at 35%–45% of FC in  $C_{800}$  **among** all orthogonal treatments **for *P. orientalis*, as well as that for *Q. variabilis*.** Further, elevated  $[CO_2]$  enhanced the  $WUE_{ge}$  of *Q. variabilis* clearly at any **SWC** except that at 60%–80% of FC. **Most saplings of *P. orientalis* had greater  $WUE_{ge}$  than did *Q. variabilis* between the same  $[CO_2] \times SWC$  treatments ( $p < 0.05$ ).**

The instantaneous water use efficiency could be determined from Eqn. (6) by the  $\delta^{13}C_{WSC}$  of leaves of two species, defined as  $WUE_{cp}$ . As illustrated in Fig. 5a,  $WUE_{cp}$  of *P. orientalis* in  $C_{600}$  or  $C_{800}$  climbed up **as water stress alleviated** beyond 50%–60% of FC, while the water threshold was 60%–70% of FC in  $C_{400}$  or  $C_{500}$ . *Q. variabilis* exhibited no uniform trend of  $WUE_{cp}$  with soil wetting (Fig. 5b). Except for  $C_{400}$ ,  $WUE_{cp}$  of *Q. variabilis* decreased abruptly at 50%–60% of FC, and **then** rose as soil moisture improved in  $C_{500}$ ,  $C_{600}$ , and  $C_{800}$ . In contrast to the findings **about  $WUE_{ge}$  in two species,  $WUE_{cp}$  of *Q. variabilis* was more pronounced than that of *P. orientalis* among all orthogonal treatments.**

### 3.4 $^{13}C$ fractionation from the site of carboxylation to cytoplasm before sugars transportation

We evaluated the total  $^{13}C$  fractionation from the site of carboxylation to cytoplasm by gas exchange and  $\delta^{13}C$  of water-soluble compounds from leaf measurements (Table 1), which can retrace  $^{13}C$  fractionation before carboxylation transport to the twig. Comparing  $\delta^{13}C_{WSC}$  with  $\delta^{13}C_{model}$  from Eqns. (4, 7 and 8), total  $^{13}C$  fractionation of *P. orientalis* ranged from 0.0328‰ to 0.0472‰, which was smaller than that of *Q. variabilis* (0.0384‰ to 0.0466‰). **The total fractionations of *P. orientalis* were magnified with soil wetting especially that was increased by 21.30%–42.04% at 35%–80% of FC from  $C_{400}$  to  $C_{800}$ . Fractionation coefficients under  $C_{400}$  and  $C_{500}$  were amplified as SWC increased until 50%–60% of FC in *Q. variabilis*, whereas it was increased at 50%–80% of FC and decreased at FC under  $C_{600}$  and  $C_{800}$ . Elevated  $[CO_2]$  enhanced the average fractionation effect of *P. orientalis*, while those of *Q. variabilis* declined sharply from  $C_{600}$  to  $C_{800}$ . Total  $^{13}C$  fractionation in *P. orientalis* increased faster than did those of *Q. variabilis* with increased soil moisture.**

### 3.5 $g_m$ imposed on the interaction of $CO_2$ concentration and water stress

According to comparison between online leaf  $\delta^{13}C_{WSC}$  and the values of gas exchange measurements,  $g_m$  over all treatments was presented in Fig. 6 (Eqns. 10–17). Significant increment trend of  $g_m$  was observed with water stress alleviated in *P. orientalis*, ranging from 0.0091–0.0690 mol  $CO_2$  m<sup>-2</sup> s<sup>-1</sup> ( $p < 0.05$ ), which reached the maximums at FC under a given  $[CO_2]$ . Yet increases in  $g_m$  of *Q. variabilis* with increasing SWC become unremarkable except that under  $C_{400}$ . With  $CO_2$  concentration elevated,  $g_m$  of two species was increased in different degrees. Comparing with *P. orientalis* under  $C_{400}$ ,  $g_m$  was increased gradiently and reached its maximum under  $C_{800}$  at 35%–60% of FC and FC ( $p < 0.05$ ), however, that was maximized under  $C_{600}$  ( $p < 0.05$ ) and slipped down under  $C_{800}$  at 60%–80% of FC. The maximum increment magnitude of  $g_m$  (8.2%–58.4%) occurred at  $C_{800}$  at any given SWC in *Q. variabilis*. It is evidently shown that  $g_m$  of *Q. variabilis* was larger than that of *P. orientalis* in the same treatment.

### 3.6 The contribution of post-carboxylation fractionation



Here, the difference between  $\Delta_i$  and  $\Delta_{obs}$  presented the  $^{13}\text{C}$  fractionation derived from mesophyll conductance. So the post-photosynthetic fractionation after carboxylation can be calculated by subtracting the fractionation derived from mesophyll conductance from the total  $^{13}\text{C}$  fractionation that is generated from the site of carboxylation to cytoplasm before sugars transportation (Table 1). The fractionation from  $g_m$  had less contribution to total  $^{13}\text{C}$  fractionation than that from synthesis of sugars belong to post-carboxylation fractionation in any given treatment (Table 1). The contributions of fractionation from  $g_m$  with two species were illustrated different variations with soil water increasing, which declined at 50%–80% of FC and rose up at FC in *P. orientalis*, yet it was shown increasing with water stress alleviated at 50%–80% of FC and then decreased at FC in *Q. variabilis*. Nevertheless, the fractionations from synthesis of sugars in leaf and these contributions to total fractionation were all increased as soil moistened with two species. Considering the effects of enriched  $[\text{CO}_2]$  on fractionations of mesophyll conductance, the fractionation from mesophyll conductance reached its average peak under  $\text{C}_{600}$  in *P. orientalis*, which occurred under  $\text{C}_{800}$  with *Q. variabilis*. Post-photosynthetic fractionations were increased along with  $[\text{CO}_2]$  elevated in *P. orientalis*, which reached those maximums under  $\text{C}_{600}$  and then slipped down differing in degrees under  $\text{C}_{800}$ .

### 3.7 Relationship between $g_s$ , $g_m$ and total $^{13}\text{C}$ fractionation

Stoma is the conduit between the plant and atmosphere. Total  $^{13}\text{C}$  fractionation after carboxylation may be correlated with resistances derived from stomata and mesophyll cells. Here, we performed linear regressions between  $g_s/g_m$  and total  $^{13}\text{C}$  fractionation coefficient for *P. orientalis* and *Q. variabilis*, respectively (Fig. 7 and 8). It was apparent that total  $^{13}\text{C}$  fractionation coefficient was linearly dependent on the  $g_s$  ( $p < 0.05$ ), which controls the exchange of  $\text{CO}_2$  and  $\text{H}_2\text{O}$ , and responds to environmental variation. Subsequently, it was shown the linear relationships between  $g_m$  and the total  $^{13}\text{C}$  fractionation coefficient, reflecting variation of  $\text{CO}_2$  concentration through the chloroplast was correlated with the carbon discrimination happened after photosynthesis in the leaf.

## 4 Discussion

### 4.1 Photosynthetic traits

The exchange of  $\text{CO}_2$  and water vapor via stomata is modulated in part by the soil or leaf water potential (Robredo et al., 2010). Saplings of *P. orientalis* reached their maximums of  $P_n$  and  $g_s$  at 70%–80% of FC under any  $[\text{CO}_2]$ . As SWC exceeded the water threshold, elevated  $\text{CO}_2$  caused a greater reduction in  $g_s$ , as has been reported for barley and wheat (Wall et al., 2011). Further, Maximal  $g_s$  of *Q. variabilis* in  $\text{C}_{400}$ ,  $\text{C}_{500}$ ,  $\text{C}_{600}$ , and  $\text{C}_{800}$  were generated successively as soil moisture increased, indicating that relative drought can stimulate the stomata which are more sensitive to environmental changes. In addition,  $C_i$  of *Q. variabilis* peaked at 60%–70% of FC and followed declines as soil moisture increased (Wall et al., 2006; Wall et al., 2011). This is interpreted as stomata having the tendency to maintain a constant  $C_i$  or  $C_i/C_a$  when ambient  $[\text{CO}_2]$  increases, which would determine the  $\text{CO}_2$  used directly in chloroplast (Yu et al., 2010). On the basis of theories (Farquhar and Sharkey, 1982) and common experimental technologies (Xu, 1997), this could be explained as the stomatal limitation. However,  $C_i$  of *P. orientalis* was increased considerably while SWC exceeded 70%–80% of FC, as found by Mielke et al. (2000). One factor that can account for that is plants close their stomata to reduce intensive loss of water during the synthesis of organic matter, simultaneously decreasing the availability of  $\text{CO}_2$  and generating respiration of organic matter (Robredo et al., 2007). Another explanation is the limited root volume in potted experiments may not be able to absorb sufficient water to support full growth of shoots

(Leakey et al., 2009; Wall et al., 2011). In our study, further increasing [CO<sub>2</sub>] may cause nonstomatal limitation as SWC exceeding the threshold (70%–80% of FC), i.e., accumulation of nonstructural carbohydrates in leaf tissue that induces mesophyll-based and/or biochemical-based transient inhibition of photosynthetic capacity (Farquhar and Sharkey, 1982). Xu and Zhou (2011) developed a five-level SWC gradient to examine the effect of water on the physiological characteristics of perennial *Leymus chinensis*, demonstrating that there was the soil water irrigation maximum below which the plant could manage itself to adjust changing environment. Miranda Apodaca et al. (2015) also concluded that, in suitable water conditions, elevated CO<sub>2</sub> augmented CO<sub>2</sub> assimilation of herbaceous plants.

The  $P_n$  of the two species increased with elevated [CO<sub>2</sub>] in our study, similarly with the results from C<sub>3</sub> woody plants (Kgope et al., 2010). Further, increasing [CO<sub>2</sub>] alleviated severe drought and heavy irrigation, which verifies that photosynthetic inhibition produced by water stress or excess may be mediated by increased [CO<sub>2</sub>] (Robredo et al., 2007; Robredo et al., 2010) and meliorate the adverse effects of drought stress by decreasing plant transpiration (Kirkham, 2016; Kadam et al., 2014; Miranda Apodaca et al., 2015; Tausz Posch et al., 2013).

#### 4.2 Differences between WUE<sub>ge</sub> and WUE<sub>cp</sub>

The increments of WUE<sub>ge</sub> in *P. orientalis* and *Q. variabilis* that resulted from the combination of an increase in  $P_n$  and decrease in  $g_s$ , followed by the reduction of  $T_r$  (Figs. 2a, 2g, 2b and 2h), also were demonstrated by Ainsworth and McGrath (2010). Combining  $P_n$  and  $T_r$  of two species in the same treatment, lower WUE<sub>ge</sub> in *Q. variabilis* is obtained due to its physiological and morphological traits, such as larger leaf area, rapid growth, and higher stomatal conductance than that of *P. orientalis* (Adiredjo et al., 2014). Medlyn et al. (2001) reported that the stomatal conductance of broadleaved species is more sensitive to elevated CO<sub>2</sub> concentrations than is that of conifers. Moreover, there has been no consensus on the patterns of iWUE with related soil water states at the leaf level, although some have discussed this topic (Yang et al., 2010). The WUE<sub>ge</sub> of *P. orientalis* and *Q. variabilis* was enhanced with water drying, as presented by Parker and Pallardy (1991), DeLucia and Heckathorn (1989), and Reich et al. (1989). Leakey (2009) also concluded that the WUE of plants in drought could be increased substantially, which was shown more clearly with elevated [CO<sub>2</sub>] in this study.

Bögelein et al. (2012) confirmed that WUE<sub>cp</sub> was more consistent with daily mean WUE<sub>ge</sub> than was WUE<sub>phloem</sub>. The WUE<sub>cp</sub> of two species demonstrated similar variation to those of  $\delta^{13}\text{C}_{\text{WSC}}$ , which differentiated with that of WUE<sub>ge</sub>. Pons et al. (2009) reviewed that  $\Delta$  in the leaf soluble sugar is coupled tightly with dynamics in the environment integrated over a period ranging from a few hours to 1–2 d. WUE<sub>cp</sub> of our materials responded synthetically with SWC  $\times$  [CO<sub>2</sub>] gradients over cultivated days whereas WUE<sub>ge</sub> is characterized by the instantaneous state of plants to conditions. In addition, species-specific  $\delta^{13}\text{C}_{\text{WSC}}$  were observed in the same condition. Consequently, WUE<sub>cp</sub> and WUE<sub>ge</sub> have different variable curves according to treatments.

#### 4.3 The influence of mesophyll conductance on the fractionation after carboxylation

The consensus has been reached that the routine of CO<sub>2</sub> diffusion into photosynthetic site in plant includes two main procedures, which are CO<sub>2</sub> moving from ambient environment surrounding the leaf ( $C_a$ ) to the sub-stomatic cavities ( $C_i$ ) through stomata, and from there to the site of carboxylation within the chloroplast stroma ( $C_c$ ) of leaf mesophyll. The latter diffusion is defined as mesophyll conductance ( $g_m$ ) (Flexas et al., 2008). Moreover,  $g_m$  has been identified to coordinate with environmental variables at the faster rate than that of stomatal conductance (Galmés et al., 2007; Tazoe et al., 2011; Flexas et al., 2007). During our 7-day cultivations of water stress  $\times$  [CO<sub>2</sub>],  $g_m$  increased and WUE<sub>ge</sub> was decreased as

soil moistened, which has been verified that  $g_m$  as the important factor could improve WUE under drought pretreatment (Han et al., 2016). There has been a dispute how  $g_m$  responds to fluctuation of  $\text{CO}_2$  concentration. Terashima *et al.* (2006) have confirmed that  $\text{CO}_2$  permeable aquaporin, located in the plasma membrane and inner envelope of chloroplasts (Uehlein et al. 2008), could regulate the change of  $g_m$ . In our study, different species has specific-special  $g_m$  responding to the gradient of  $[\text{CO}_2]$ .  $g_m$  of *P. orientalis* were significantly reduced by 9.08%-44.42% as  $[\text{CO}_2]$  rising from 600 to 800 ppm at 60%-80% of FC, being similar to the results obtained by Flexas *et al.* (2007). Although larger  $g_m$  of *Q. variabilis* under  $\text{C}_{800}$  was observed, it made almost no difference.

Furthermore,  $g_m$  contributed to the  $^{13}\text{C}$  fractionation following the carboxylation while photosynthate has not been transported to the twigs of plant. The  $^{13}\text{C}$  fractionation of  $\text{CO}_2$  from air surrounding leaf to sub-stomatal cavity may be simply considered, whereas the fractionation induced by mesophyll conductance from sub-stomatic cavities to the site of carboxylation in the chloroplast cannot be neglected (Pons et al., 2009; Cano et al., 2014). As estimating the post-photosynthetic fractionation in leaf, carbon discrimination generated by mesophyll conductance must be subtracted from  $^{13}\text{C}$  fractionation from the site of carboxylation to cytoplasm before sugars transportation (the difference between  $\delta^{13}\text{C}_{\text{WSC}}$  and  $\delta^{13}\text{C}_{\text{model}}$ ), which was closely associated with  $g_m$  (Fig 8,  $p < 0.05$ ). Similar variations of fractionation derived from  $g_m$  were presented with that of  $g_m$  under orthogonal tests on Table 1.

#### 4.4 Post-carboxylation fractionation generated before photosynthate leaving leaves

Photosynthesis, a biochemical and physiological process (Badeck et al., 2005), is characterized by discrimination against  $^{13}\text{C}$ , which leaves an isotopic signature in the photosynthetic apparatus. There is already a classic review of the carbon-fractionation in leaves (Farquhar et al., 1989) that covers the significant aspects of photosynthetic carbon isotope discrimination. The post-photosynthetic fractionation associated with the metabolic pathways of non-structural carbohydrates (NSC; defined here as soluble sugars + starch) within leaves, and fractionation during translocation, storage, and remobilization prior to tree ring formation remain unclear (Epron et al., 2012; Gessler et al., 2014; Rinne et al., 2016). The synthetic processes of sucrose and starch before transportation to the twig are within the domain of post-carboxylation fractionation generated in leaves. Hence, we hypothesized that  $^{13}\text{C}$  fractionation might exist. When we finished the leaf gas exchange measurements, the leaf samples were collected immediately to determine the  $\delta^{13}\text{C}$  of water-soluble compounds ( $\delta^{13}\text{C}_{\text{WSC}}$ ). Presumably, the  $^{13}\text{C}$  fractionation generated in the synthetic processes of sucrose and starch was approximately contained within the  $^{13}\text{C}$  fractionation from the site of carboxylation to cytoplasm before sugars transportation as total  $^{13}\text{C}$  fractionation. When comparing  $\delta^{13}\text{C}_{\text{WSC}}$  with  $\delta^{13}\text{C}_{\text{obs}}$ , total fractionations of *P. orientalis* ranged from 0.0328‰ to 0.0472‰, less than that of *Q. variabilis* (from 0.0384‰ to 0.0466‰). Then total  $^{13}\text{C}$  fractionation subtracted by fractionation derived from mesophyll conductance, post-photosynthetic fractionation occupied 75.30%-98.9% of total  $^{13}\text{C}$  fractionation. Recently, Gessler et al. (2004) reviewed the environmental drivers of variation in photosynthetic carbon isotope discrimination in terrestrial plants. The  $^{13}\text{C}$  fractionation of *P. orientalis* were enhanced by soil moistening, consistent with that of *Q. variabilis*, except at FC. The  $^{13}\text{C}$  isotope signature of *P. orientalis* was dampened by elevated  $[\text{CO}_2]$ . Yet,  $^{13}\text{C}$ -depletion was weakened in *Q. variabilis* in  $\text{C}_{600}$  and  $\text{C}_{800}$ . Linear regression between  $g_s$  and total  $^{13}\text{C}$  fractionation coefficient indicated that the post-carboxylation fractionation in leaves depended on the variation of  $g_s$  and stomata aperture correlated with environmental change.

## 5 Conclusions

Through orthogonal treatments of four  $[CO_2]$   $\times$  five SWC,  $WUE_{cp}$  calculated by  $\delta^{13}C$  of water-soluble compound and  $WUE_{ge}$  derived from simultaneous leaf gas exchange for leaves were estimated to differentiate the  $\delta^{13}C$  signal variation before leaf-exported translocation of primary assimilates. The influence of mesophyll conductance on the difference of  $^{13}C$  fractionation between the sub-stomatic cavities and the ambient environment need to be considered, while testing the hypothesis that the post-carboxylation will contribute to the  $^{13}C$  fractionation from the site of carboxylation to cytoplasm before sugars transportation. In response to the interactive effects of  $[CO_2]$  and SWC,  $WUE_{ge}$  of the two species of saplings both decreased with soil moistening, and increased with elevated  $[CO_2]$  at 35%–80% of FC. We concluded that relative soil drying, coupled with elevated  $[CO_2]$ , could improve  $WUE_{ge}$  by strengthening photosynthetic capacity and reducing transpiration.  $WUE_{ge}$  of *P. orientalis* was significantly greater than was that of *Q. variabilis*, while the opposite was the case for  $WUE_{cp}$  in two species. Mesophyll conductance and post-photosynthesis were manifested both contributing to the  $^{13}C$  fractionation from the site of carboxylation to cytoplasm before sugars transportation determined by gas exchange and carbon isotopic measurements. Rising  $[CO_2]$  and/or soil moistening generated increasing disparities between  $\delta^{13}C_{WSC}$  and  $\delta^{13}C_{model}$  in *P. orientalis*; nevertheless, the differences between  $\delta^{13}C_{WSC}$  and  $\delta^{13}C_{model}$  in *Q. variabilis* increased as  $[CO_2]$  being less than 600 ppm and/or water stress was alleviated. Total  $^{13}C$  fractionation in leaf was linearly dependent on  $g_s$ . With respect to carbon fractionation in post-carboxylation and transportation processes, we cannot neglect that the instantaneous water use efficiency derived from the synthesis of sucrose and starch were influenced inevitably by environmental changes. Thus, cautious descriptions of the magnitude and environmental dependence of apparent post-carboxylation fractionation are worth our attention in photosynthetic fractionation.

## References

- Adiredjo, A. L., Navaud, O., Lamaze, T., and Grieu, P.: Leaf carbon isotope discrimination as an accurate indicator of water use efficiency in sunflower genotypes subjected to five stable soil water contents, *J Agron. Crop Sci.*, 200, 416–424, 2014.
- Ainsworth, E. A. and McGrath, J. M.: Direct effects of rising atmospheric carbon dioxide and ozone on crop yields, *Climate Change and Food Security*, Springer, 109–130, 2010.
- Badeck, F. W., Tcherkez, G., Eacute, N. S. S., Piel, C. E. M., and Ghashghaie, J.: Post-photosynthetic fractionation of stable carbon isotopes between plant organ – a widespread phenomenon, *Rapid Commun. Mass S.*, 19, 1381–1391, 2005.
- Bögelein, R., Hassdenteufel, M., Thomas, F. M., and Werner, W.: Comparison of leaf gas exchange and stable isotope signature of water-soluble compounds along canopy gradients of co-occurring Douglas-fir and European beech, *Plant Cell Environ.*, 35, 1245–1257, 2012.
- Brandes, E., Kodama, N., Whittaker, K., Weston, C., Rennenberg, H., Keitel, C., Adams, M. A., and Gessler, A.: Short-term variation in the isotopic composition of organic matter allocated from the leaves to the stem of *Pinus sylvestris*: effects of photosynthetic and postphotosynthetic carbon isotope fractionation, *Global Change Biol.*, 12, 1922–1939, 2006.
- Brooks, A. and Farquhar, G. D.: Effect of temperature on the  $CO_2/O_2$  specificity of ribulose-1,5-bisphosphate carboxylase/oxygenase and the rate of respiration in the light, *Planta*, 165, 397–406, 1985.
- Brugnoli E, Farquhar GD. 2000. Photosynthetic fractionation of carbon isotopes. In: Leegood RC, Sharkey TD, von Caemmerer S. eds. *Photosynthesis: physiology and metabolism*. Advances in photosynthesis. Dordrecht, The Netherlands: Kluwer Academic Publishers, 399–434.

- Cano, F. J., López, R., and Warren, C. R.: Implications of the mesophyll conductance to CO<sub>2</sub> for photosynthesis and water-use efficiency during long-term water stress and recovery in two contrasting *Eucalyptus* species, *Plant Cell Environ.*, 37, 2470–2490, 2014.
- Cernusak, L. A., Ubierna, N., Winter, K., Holtum, J. A. M., Marshall, J. D., and Farquhar, G. D.: Environmental and physiological determinants of carbon isotope discrimination in terrestrial plants, *New Phytologist*, 200, 950–965, 2013.
- DeLucia, E. H. and Heckathorn, S. A.: The effect of soil drought on water-use efficiency in a contrasting Great Basin desert and Sierran montane species, *Plant Cell Environ.*, 12, 935–940, 1989.
- Epron, D., Nouvellon, Y., and Ryan, M. G.: Introduction to the invited issue on carbon allocation of trees and forests, *Tree physiol.*, 32, 639–643, 2012.
- Evans, J. R., Kaldenhoff, R., Genty, B., and Terashima, I.: Resistances along the CO<sub>2</sub> diffusion pathway inside leaves, *J. Exp. Bot.*, 60, 2235–2248, 2009.
- Evans, J. R., Sharkey, T. D., Berry, J. A., and Farquhar, G. D.: Carbon isotope discrimination measured concurrently with gas-exchange to investigate CO<sub>2</sub> diffusion in leaves of higher-plants, *Funct. Plant Biol.*, 13, 281–292, 1986.
- Evans, J. R. and von Caemmerer, S.: Temperature response of carbon isotope discrimination and mesophyll conductance in tobacco, *Plant Cell Environ.*, 36, 745–756, 2013.
- Farquhar, G. D., Ehleringer, J. R., and Hubick, K. T.: Carbon isotope discrimination and photosynthesis, *Ann. Rev. Plant Physiol.*, 40, 503–537, 1989.
- Farquhar, G. D., O'Leary, M. H., and Berry, J. A.: On the relationship between carbon isotope discrimination and the intercellular carbon dioxide concentration in leaves, *Funct. Plant Biol.*, 9, 121–137, 1982.
- Farquhar, G. D. and Sharkey, T. D.: Stomatal conductance and photosynthesis, *Ann. Rev. Plant Physiol.*, 33, 317–345, 1982.
- Flexas, J., Barbour, M. M., Brendel, O., Cabrera, H. M., Carriqui M., Díaz-Espejo, A., Douthe, C., Dreyer, E., Ferrio, J. P., Gago, J., Gallé A., Galmés, J., Kodama, N., Medrano, H., Niinemets, Ü., Peguero-Pina, J. J., Pou, A., Ribas-Carbó M., Tomás, M., Tosens, T., and Warren, C. R.: Mesophyll diffusion conductance to CO<sub>2</sub>: An unappreciated central player in photosynthesis, *Plant Science*, 193–194, 70–84, 2012.
- Flexas, J., Carriqui M., Coopman, R. E., Gago, J., Galmés, J., Martorell, S., Morales, F., and Diaz-Espejo, A.: Stomatal and mesophyll conductances to CO<sub>2</sub> in different plant groups: Underrated factors for predicting leaf photosynthesis responses to climate change? *Plant Science*, 226, 41–48, 2014.
- Flexas, J., Diaz-Espejo, A., Galmés, J., Kaldenhoff, R., Medano, H., and Ribas-Carbo, M.: Rapid variations of mesophyll conductance in response to changes in CO<sub>2</sub> concentration around leaves, *Plant Cell Environ.*, 30, 1284–1298, 2007.
- Flexas, J., Ribas-Carbó M., Diaz-Espejo, A., Galmés, J., and Medrano, H.: Mesophyll conductance to CO<sub>2</sub>: current knowledge and future prospects, *Plant Cell Environ.*, 31, 602–621, 2008.
- Flexas, J., Ribas-Carbó M., Hanson, D.T., Bota, J., Otto, B., Cifre, J., McDowell, N., Medrano, H., and Kaldenhoff, R.: Tobacco aquaporin NtAQP1 is involved in mesophyll conductance to CO<sub>2</sub> *in vivo*, *Plant J.*, 48, 427–439, 2006.
- Galmés, J., Medrano, H., and Flexas, J.: Photosynthetic limitations in response to water stress and recovery in Mediterranean plants with different growth forms, *New Phytol.*, 175, 81–93, 2007.
- Gessler, A., Brandes, E., Buchmann, N., Helle, G., Rennenberg, H., and Barnard, R. L.: Tracing carbon

- and oxygen isotope signals from newly assimilated sugars in the leaves to the tree-ring archive, *Plant Cell Environ.*, 32, 780–795, 2009.
- Gessler, A., Ferrio, J. P., Hommel, R., Treydte, K., Werner, R. A., and Monson, R. K.: Stable isotopes in tree rings: towards a mechanistic understanding of isotope fractionation and mixing processes from the leaves to the wood, *Tree Physiol.*, 34, 796–818, 2014.
- Gessler, A., Rennenberg, H., and Keitel, C.: Stable isotope composition of organic compounds transported in the phloem of European beech-evaluation of different methods of phloem sap collection and assessment of gradients in carbon isotope composition during leaf-to-stem transport, *Plant Biology*, 6, 721–729, 2004.
- Gessler, A., Tcherkez, G., Peuke, A. D., Ghashghaie, J., and Farquhar, G. D.: Experimental evidence for diel variations of the carbon isotope composition in leaf, stem and phloem sap organic matter in *Ricinus communis*, *Plant Cell Environ.*, 31, 941–953, 2008.
- Gillon, J. S., Griffiths, H.: The influence of (photo)respiration on carbon isotope discrimination in plants. *Plant Cell Environ.*, 20, 1217–1230, 1997.
- Gleixner, G. and Schmidt, H.: Carbon isotope effects on the fructose-1, 6-bisphosphate aldolase reaction, origin for non-statistical  $^{13}\text{C}$  distributions in carbohydrates, *J. Biol. Chem.*, 272, 5382–5387, 1997.
- Guy, R. D., Fogel, M. L., and Berry, J. A.: Photosynthetic fractionation of the stable isotopes of oxygen and carbon, *Plant Physiol.*, 101, 37–47, 1993.
- Han, J. M., Meng, H. F., Wang, S. Y., Jiang, C. D., Liu, F., Zhang, W. F., and Zhang, Y. L.: Variability of mesophyll conductance and its relationship with water use efficiency in cotton leaves under drought pretreatment, *J. Plant Physiol.*, 194, 61–71, 2016.
- Hommel, R., Siegwolf, R., Saurer, M., Farquhar, G. D., Kayler, Z., Ferrio, J. P., and Gessler, A.: Drought response of mesophyll conductance in forest understory species-impacts on water-use efficiency and interactions with leaf water movement, *Physiol. Plantarum*, 152, 98–114, 2014.
- Igamberdiev, A. U., Mikkelsen, T. N., Ambus, P., Bauwe, H., and Lea, P. J.: Photorespiration contributes to stomatal regulation and carbon isotope fractionation: a study with barley, potato and Arabidopsis plants deficient in glycine decarboxylase, *Photosynth. Res.*, 81, 139–152, 2004.
- IPCC: Summary for policymakers, in: Climate Change 2014, Mitigation of Climate Change, contribution of Working Group III to the Fifth Assessment Report of the Intergovernmental Panel on Climate Change, edited by: Edenhofer, O., Pichs-Madruga, R., Sokona, Y., Farahani, E., Kadner, S., Seyboth, K., Adler, A., Baum, I., Brunner, S., Eickemeier, P., Kriemann, B., Savolainen, J., Schlomer, S., von Stechow, C., Zwickel, T., and Minx, J. C., Cambridge University Press, Cambridge, UK and New York, NY, USA, 1–30, 2014.
- Jäggi, M., Saurer, M., Fuhrer, J., and Siegwolf, R.: The relationship between the stable carbon isotope composition of needle bulk material, starch, and tree rings in *Picea abies*, *Oecologia*, 131, 325–332, 2002.
- Kadam, N. N., Xiao, G., Melgar, R. J., Bahuguna, R. N., Quinones, C., Tamilselvan, A., Prasad, P. V. V., and Jagadish, K. S. V.: Chapter three-agronomic and physiological responses to high temperature, drought, and elevated  $\text{CO}_2$  interactions in cereals, *Adv. Agron.*, 127, 111–156, 2014.
- Kgope, B. S., Bond, W. J., and Midgley, G. F.: Growth responses of African savanna trees implicate atmospheric  $[\text{CO}_2]$  as a driver of past and current changes in savanna tree cover, *Austral Ecol.*, 35, 451–463, 2010.
- Kirkham, M. B.: Elevated carbon dioxide: impacts on soil and plant water relations, CRC Press, London, New York, 2016.



583 Kodama, N., Barnard, R. L., Salmon, Y., Weston, C., Ferrio, J. P., Holst, J., Werner, R. A., Saurer, M.,  
 584 Rennenberg, H., and Buchmann, N.: Temporal dynamics of the carbon isotope composition in a  
 585 *Pinus sylvestris* stand: from newly assimilated organic carbon to respired carbon dioxide, *Oecologia*,  
 586 156, 737–750, 2008.

587 Lanigan, G. J., Betson, N., Griffiths, H., and Seibt, U.: Carbon isotope fractionation during  
 588 photorespiration and carboxylation in *Senecio*, *Plant Physiol.*, 148, 2013–2020, 2008.

589 Le Roux, X., Bariac, T., Sinoquet H., Genty, B., Piel, C., Mariotti, A., Girardin, C., and Richard, P.:  
 590 Spatial distribution of leaf water-use efficiency and carbon isotope discrimination within an isolated  
 591 tree crown, *Plant Cell Environ.*, 24, 1021–1032, 2001.

592 Leakey, A. D.: Rising atmospheric carbon dioxide concentration and the future of C4 crops for food and  
 593 fuel, *Proceedings of the Royal Society of London B: Biological Sciences*, 276, 1517–2008, 2009.

594 Leakey, A. D., Ainsworth, E. A., Bernacchi, C. J., Rogers, A., Long, S. P., and Ort, D. R.: Elevated CO<sub>2</sub>  
 595 effects on plant carbon, nitrogen, and water relations: six important lessons from FACE, *J. Exp.*  
 596 *Bot.*, 60, 2859–2876, 2009.

597 Lobell, D. B., Roberts, M. J., Schlenker, W., Braun, N., Little, B. B., Rejesus, R. M., and Hammer, G.  
 598 L.: Greater sensitivity to drought accompanies maize yield increase in the US Midwest, *Science*,  
 599 344, 516–519, 2014.

600 Medlyn, B. E., Barton, C. V. M., Broadmeadow, M. S. J., Ceulemans, R., Angelis, P. D., Forstreuter, M.,  
 601 Freeman, M., Jackson, S. B., Kellomäki, S., and Laitat, E.: Stomatal conductance of forest species  
 602 after long-term exposure to elevated CO<sub>2</sub> concentration: a synthesis, *New Phytol.*, 149, 247–264,  
 603 2001.

604 Mielke, M. S., Oliva, M. A., de Barros, N. F., Penchel, R. M., Martinez, C. A., Da Fonseca, S., and de  
 605 Almeida, A. C.: Leaf gas exchange in a clonal eucalypt plantation as related to soil moisture, leaf  
 606 water potential and microclimate variables, *Trees*, 14, 263–270, 2000.

607 Miranda Apodaca, J., Pérez López, U., Lacuesta, M., Mena Petite, A., and Muñoz Rueda, A.: The type  
 608 of competition modulates the ecophysiological response of grassland species to elevated CO<sub>2</sub> and  
 609 drought, *Plant Biolog.*, 17, 298–310, 2015.

610 Parker, W. C. and Pallardy, S. G.: Gas exchange during a soil drying cycle in seedlings of four black  
 611 walnut (*Juglans nigra* L.) Families, *Tree physiol.*, 9, 339–348, 1991.

612 Pons, T. L., Flexas, J., von Caemmerer, S., Evans, J. R., Genty, B., Ribas-Carbo, M., and Brugnoli, E.:  
 613 Estimating mesophyll conductance to CO<sub>2</sub>: methodology, potential errors, and recommendations, *J.*  
 614 *Exp. Bot.*, 8, 1–18, 2009.

615 Reich, P. B., Walters, M. B., and Tabone, T. J.: Response of *Ulmus americana* seedlings to varying  
 616 nitrogen and water status. 2 Water and nitrogen use efficiency in photosynthesis, *Tree Physiol.*, 5,  
 617 173–184, 1989.

618 Rinne, K. T., Saurer, M., Kirdyanov, A. V., Bryukhanova, M. V., Prokushkin, A. S., Churakova Sidorova,  
 619 O. V., and Siegwolf, R. T.: Examining the response of larch needle carbohydrates to climate using  
 620 compound-specific  $\delta^{13}\text{C}$  and concentration analyses, *EGU General Assembly Conference*,  
 621 1814949R, 2016.

622 Robredo, A., Pérez-López, U., de la Maza, H. S., González-Moro, B., Lacuesta, M., Mena-Petite, A., and  
 623 Muñoz-Rueda, A.: Elevated CO<sub>2</sub> alleviates the impact of drought on barley improving water status  
 624 by lowering stomatal conductance and delaying its effects on photosynthesis, *Environ. Exp. Bot.*,  
 625 59, 252–263, 2007.

626 Robredo, A., Pérez-López, U., Lacuesta, M., Mena-Petite, A., and Muñoz-Rueda, A.: Influence of water

- stress on photosynthetic characteristics in barley plants under ambient and elevated CO<sub>2</sub> concentrations, *Biologia. Plantarum*, 54, 285–292, 2010.
- Rossmann, A., Butzenlechner, M., and Schmidt, H.: Evidence for a nonstatistical carbon isotope distribution in natural glucose, *Plant Physiol.*, 96, 609–614, 1991.
- Streit, K., Rinne, K. T., Hagedorn, F., Dawes, M. A., Saurer, M., Hoch, G., Werner, R. A., Buchmann, N., and Siegwolf, R. T. W.: Tracing fresh assimilates through *Larix decidua* exposed to elevated CO<sub>2</sub> and soil warming at the alpine treeline using compound-specific stable isotope analysis, *New Phytol.*, 197, 838–849, 2013.
- Tausz Posch, S., Norton, R. M., Seneweera, S., Fitzgerald, G. J., and Tausz, M.: Will intra-specific differences in transpiration efficiency in wheat be maintained in a high CO<sub>2</sub> world? A FACE study, *Physiol. Plantarum*, 148, 232–245, 2013.
- Tazoe, Y., von Caemmerer, S., Estavillo, G. M., and Evans, J. R.: Using tunable diode laser spectroscopy to measure carbon isotope discrimination and mesophyll conductance to CO<sub>2</sub> diffusion dynamically at different CO<sub>2</sub> concentrations, *Plant Cell Environ.*, 34, 580–591, 2011.
- Terashima, I., Hanba, Y.T., Tazoe, Y., Vyas, P., and Yano, S.: Irradiance and phenotype: comparative eco-development of sun and shade leaves in relation to photosynthetic CO<sub>2</sub> diffusion, *J. Exp. Bot.*, 57, 343–354, 2006.
- Théroux-Rancourt, G., Éthier, G., and Pepin, S.: Threshold response of mesophyll CO<sub>2</sub> conductance to leaf hydraulics in highly transpiring hybrid poplar clones exposed to soil drying, *J. Exp. Bot.*, 65, 741–753, 2014.
- Uehlein, N., Otto, B., Hanson, D. T., Fischer, M., McDowell, N., and Kaldenhoff, R.: Function of *Nicotiana tabacum* aquaporins as chloroplast gas pores challenges the concept of membrane CO<sub>2</sub> permeability, *Plant Cell*, 20, 648–657, 2008.
- Von Caemmerer, S. V. and Farquhar, G. D.: Some relationships between the biochemistry of photosynthesis and the gas exchange of leaves, *Planta*, 153, 376–387, 1981.
- Wall, G. W., Garcia, R. L., Kimball, B. A., Hunsaker, D. J., Pinter, P. J., Long, S. P., Osborne, C. P., Hendrix, D. L., Wechsung, F., and Wechsung, G.: Interactive effects of elevated carbon dioxide and drought on wheat, *Agron. J.*, 98, 354–381, 2006.
- Wall, G. W., Garcia, R. L., Wechsung, F., and Kimball, B. A.: Elevated atmospheric CO<sub>2</sub> and drought effects on leaf gas exchange properties of barley, *Agr. Ecosyst. Environ.*, 144, 390–404, 2011.
- Warren, C. R. and Adams, M. A.: Internal conductance does not scale with photosynthetic capacity: implications for carbon isotope discrimination and the economics of water and nitrogen use in photosynthesis, *Plant Cell Environ.*, 29, 192–201, 2006.
- Xu, D. Q.: Some problems in stomatal limitation analysis of photosynthesis, *Plant Physiol. J.*, 33, 241–244, 1997.
- Xu, Z. and Zhou, G.: Responses of photosynthetic capacity to soil moisture gradient in perennial rhizome grass and perennial bunchgrass, *BMC Plant Biol.*, 11, 21, 2011.
- Yang, B., Pallardy, S. G., Meyers, T. P., GU, L. H., Hanson, P. J., Wullschlegel, S. D., Heuer, M., Hosman, K. P., Riggs, J. S., and Sluss D. W.: Environmental controls on water use efficiency during severe drought in an Ozark Forest in Missouri, USA, *Global Change Biol.*, 16, 2252–2271, 2010.
- Yu, G., Wang, Q., and Mi, N.: *Ecophysiology of plant photosynthesis, transpiration, and water use*, Science Press, Beijing, China, 2010.

671  
672  
673  
674  
675  
676  
677  
678  
679  
680  
681  
682  
683  
684  
685  
686  
687  
688  
689  
690  
691  
692  
693  
694  
695  
696  
697  
698  
699  
700

**Author contribution**

Na Zhao and Yabing He collected field samples, and performed the experiment. Na Zhao engaged in data analysis and writing this paper. Ping Meng proposed the suggestions on the theory and practice of experiment. Xinxiao Yu revised the paper and contributed to edit the manuscript.

*Acknowledgements.* We would like to thank Beibei Zhou and Yuanhai Lou for kind support in the collection of materials and management of saplings. We are grateful to anonymous reviewers for constructive suggestions of this manuscript. Due to the limitation of space allowed, we cited a part of literatures involving this study area and apologized for authors whose work has not been cited. All authors acknowledges support of National Natural Science Foundation of China (grant No. 41430747).

Figure

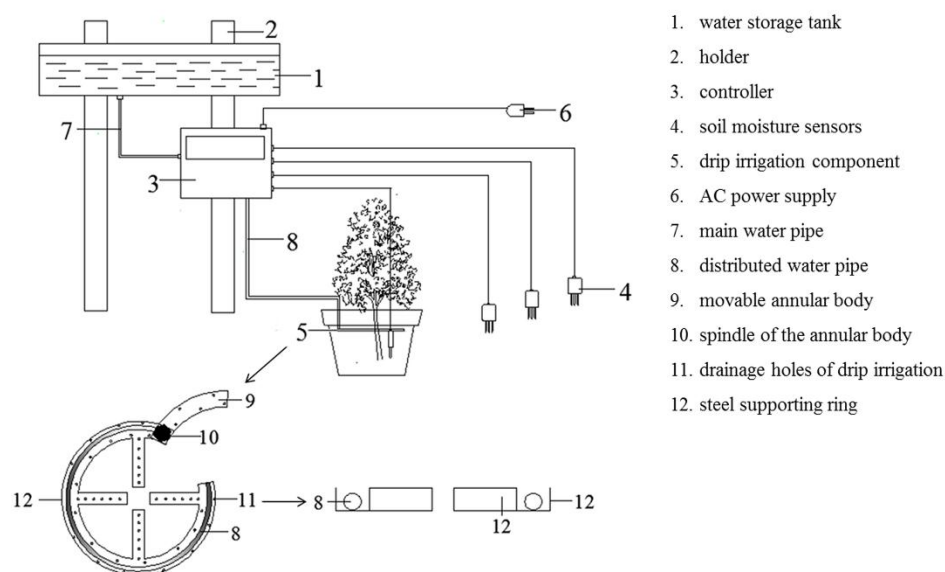

**Figure 1.** Structural diagram of the device for automatic drip irrigation

Arabic numerals indicate the individual parts of the automatic drip irrigation device (No. 1–7). The lower-left corner of this figure presents the detailed schematic for the drip irrigation components (No. 8–12). The lower-right corner of this figure shows the schematic for the drip irrigation component in profile.

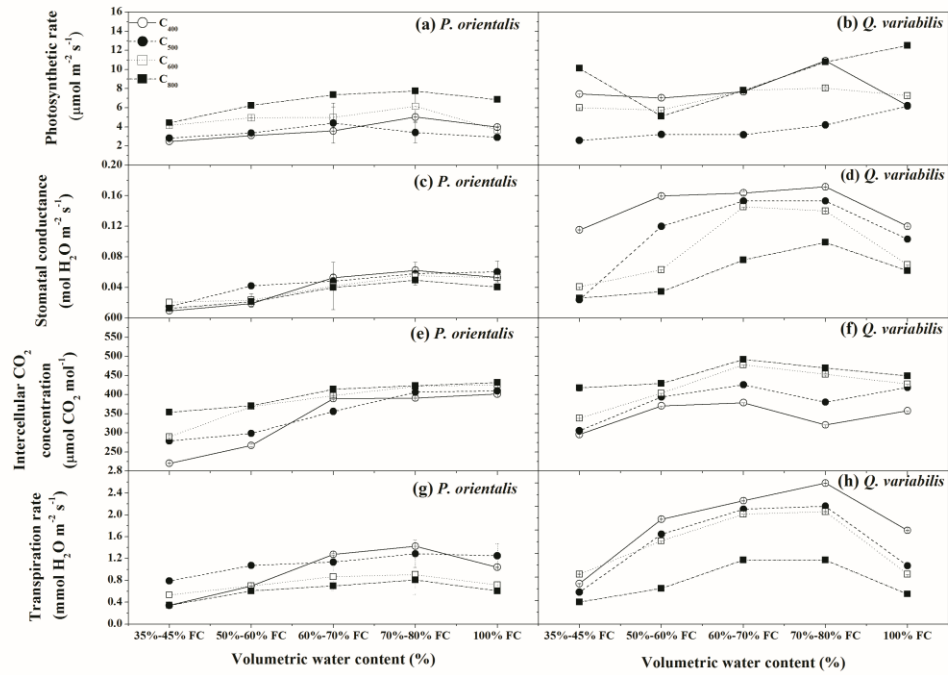

**Figure 2.** Photosynthetic parameters of *P. orientalis* and *Q. variabilis* saplings in  $CO_2$  concentrations of 400 ppm, 500 ppm, 600 ppm and 800 ppm across five soil volumetric water contents. The net photosynthetic rates ( $P_n$ ,  $\mu\text{mol m}^{-2} \text{s}^{-1}$ ), stomatal conductance ( $g_s$ ,  $\text{mol H}_2\text{O m}^{-2} \text{s}^{-1}$ ), intercellular  $CO_2$  concentration ( $C_i$ ,  $\mu\text{mol CO}_2 \text{mol}^{-1}$ ), and transpiration rates ( $T_r$ ,  $\text{mmol H}_2\text{O m}^{-2} \text{s}^{-1}$ ) are shown in Figs. 2a and 2b, 2c and 2d, 2e and 2g, and 2g and 2h, respectively. Means  $\pm$  SDs,  $n = 32$ .

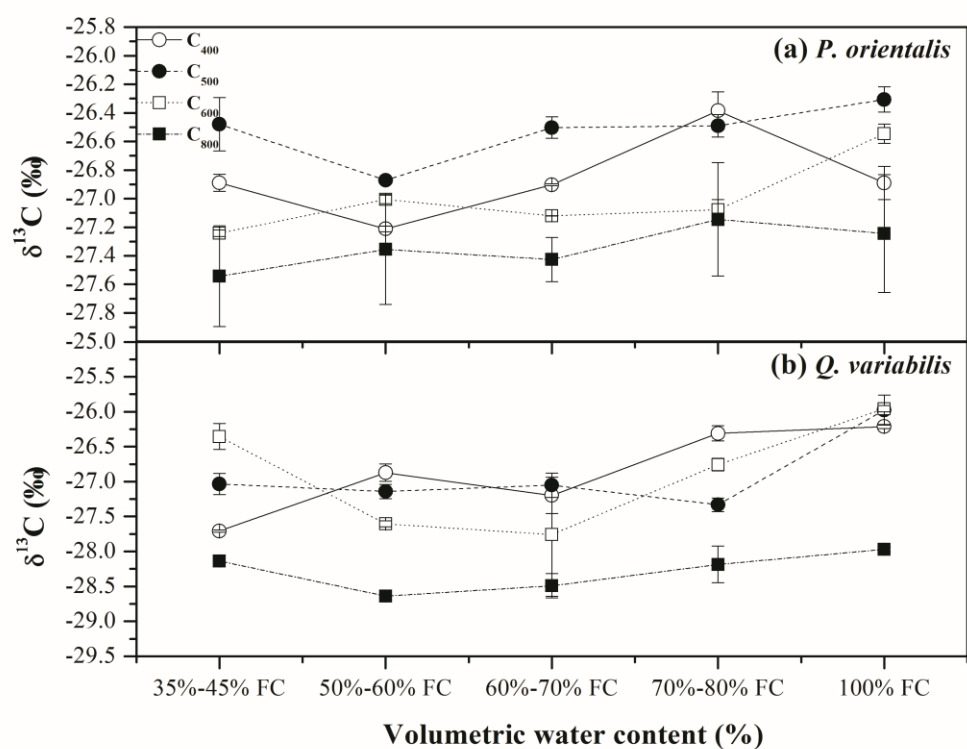

**Figure 3.**  $\delta^{13}\text{C}$  of water-soluble compounds extracted from leaves of *P. orientalis* and *Q. variabilis* cultivated in CO<sub>2</sub> concentrations of 400 ppm, 500 ppm, 600 ppm and 800 ppm across five soil volumetric water contents are shown in Figs. 3a and 3b. Means  $\pm$  SDs, n = 32.



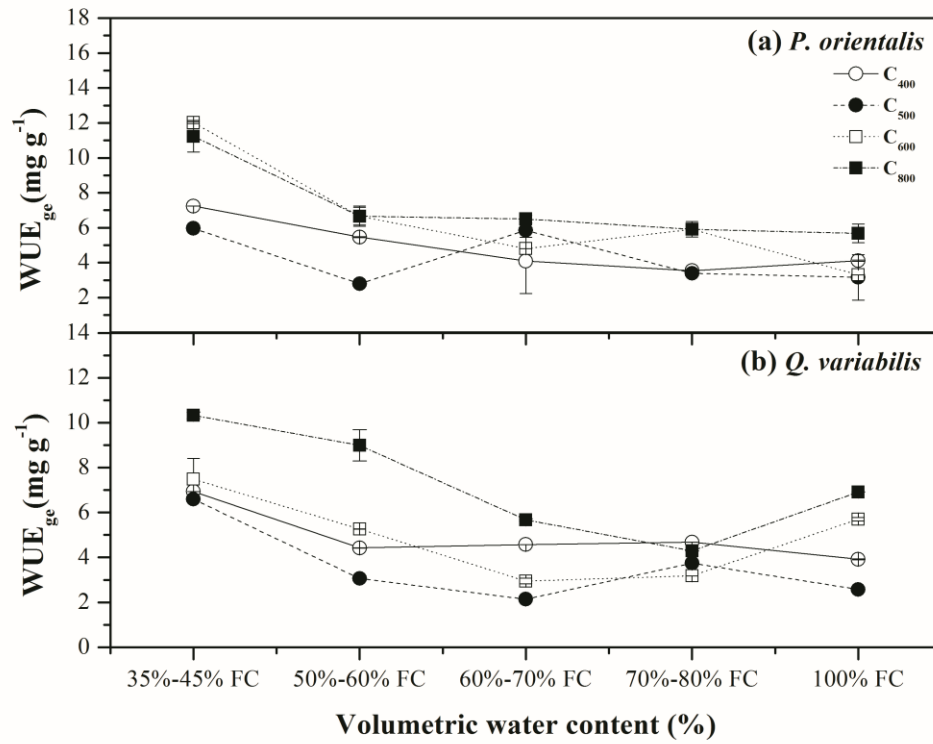

**Figure 4.** Instantaneous water use efficiency through gas exchange ( $WUE_{ge}$ ) in leaves of *P. orientalis* and *Q. variabilis* cultivated in  $CO_2$  concentrations of 400 ppm, 500 ppm, 600 ppm and 800 ppm across five soil volumetric water contents are shown in Figs. 4a and 4b. Means  $\pm$  SDs,  $n = 32$ .

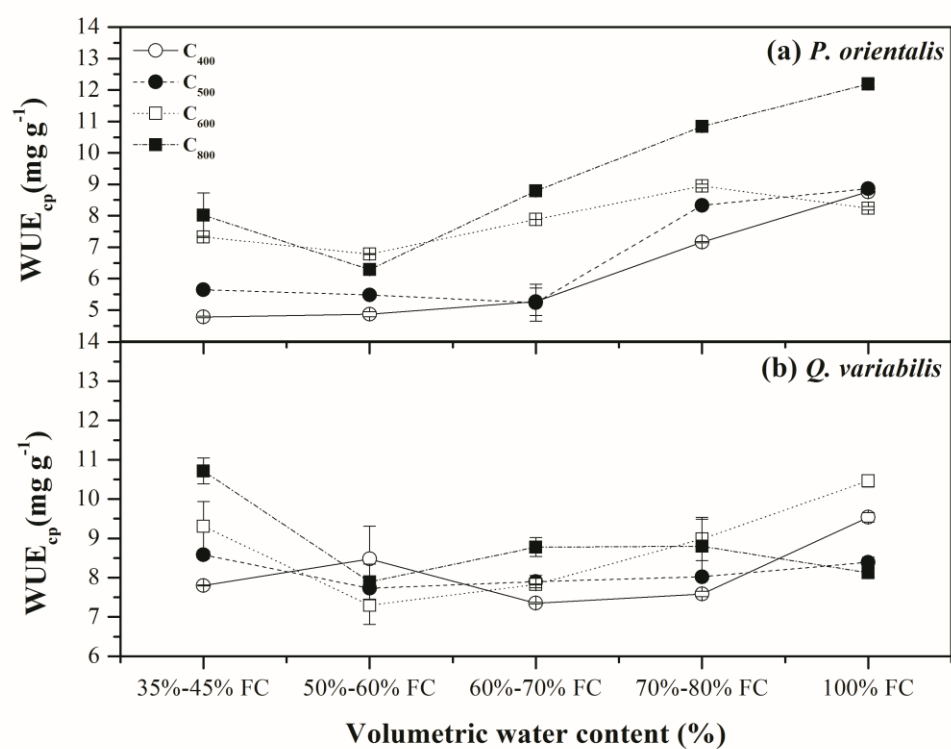

**Figure 5.** Instantaneous water use efficiency through  $\delta^{13}\text{C}$  of water-soluble compounds ( $\text{WUE}_{\text{cp}}$ ) in leaves of *P. orientalis* and *Q. variabilis* cultivated in  $\text{CO}_2$  concentrations of 400 ppm, 500 ppm, 600 ppm, and 800 ppm across five soil volumetric water contents are shown in Figs. 5a and 5b. Means  $\pm$  SDs,  $n = 32$ .

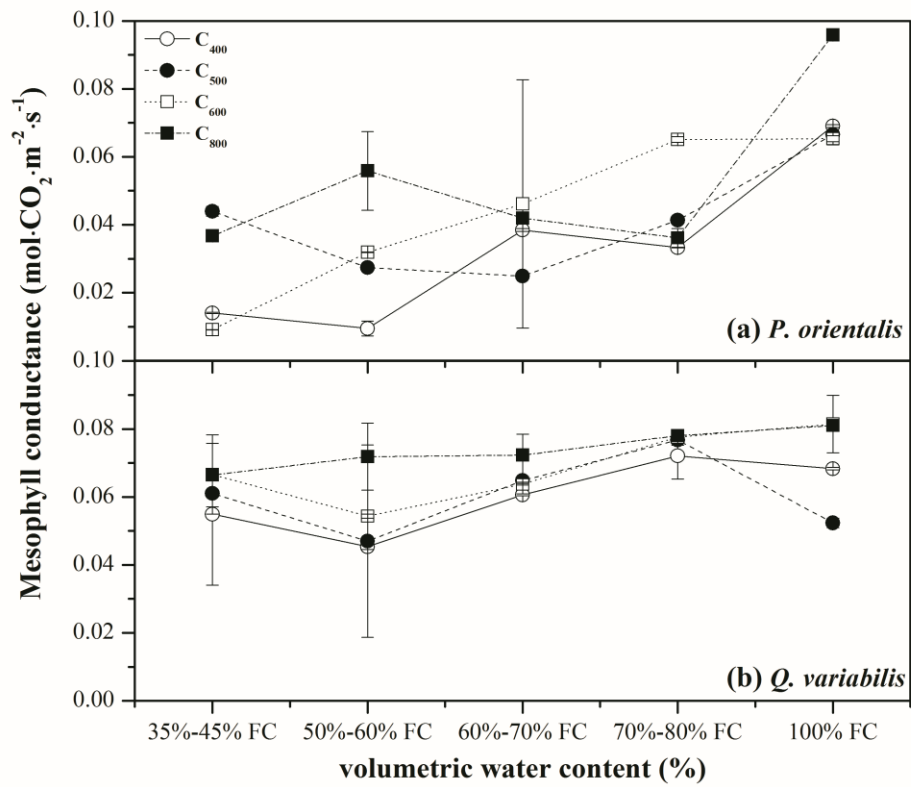

**Figure 6.** Variations in mesophyll conductance of *P. orientalis* and *Q. variabilis* cultivated in CO<sub>2</sub> concentrations of 400 ppm, 500 ppm, 600 ppm, and 800 ppm across five soil volumetric water contents are shown in Figs. 6a and 6b. Means  $\pm$  SDs, n = 32.

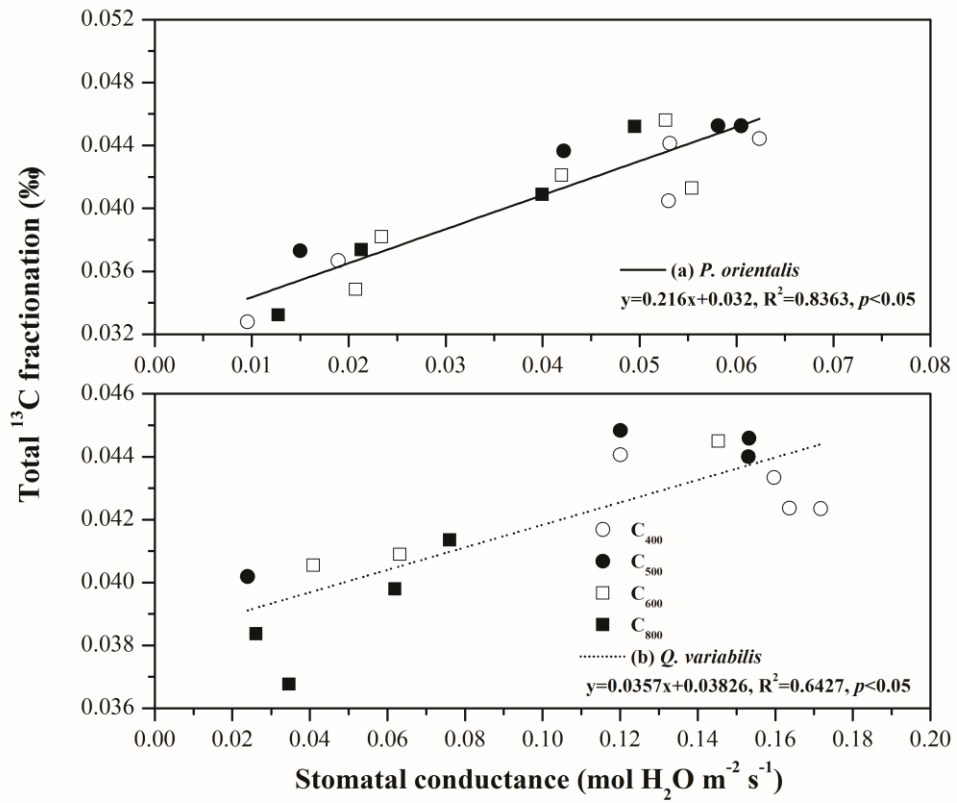

**Figure 7.** Regression between stomatal conductance and total  $^{13}\text{C}$  fractionation of *P. orientalis* and *Q. variabilis* under four  $\text{CO}_2$  concentrations  $\times$  five soil volumetric water contents are established in Figs. 7a and 7b.  $p=0.05$ ,  $n = 32$ .

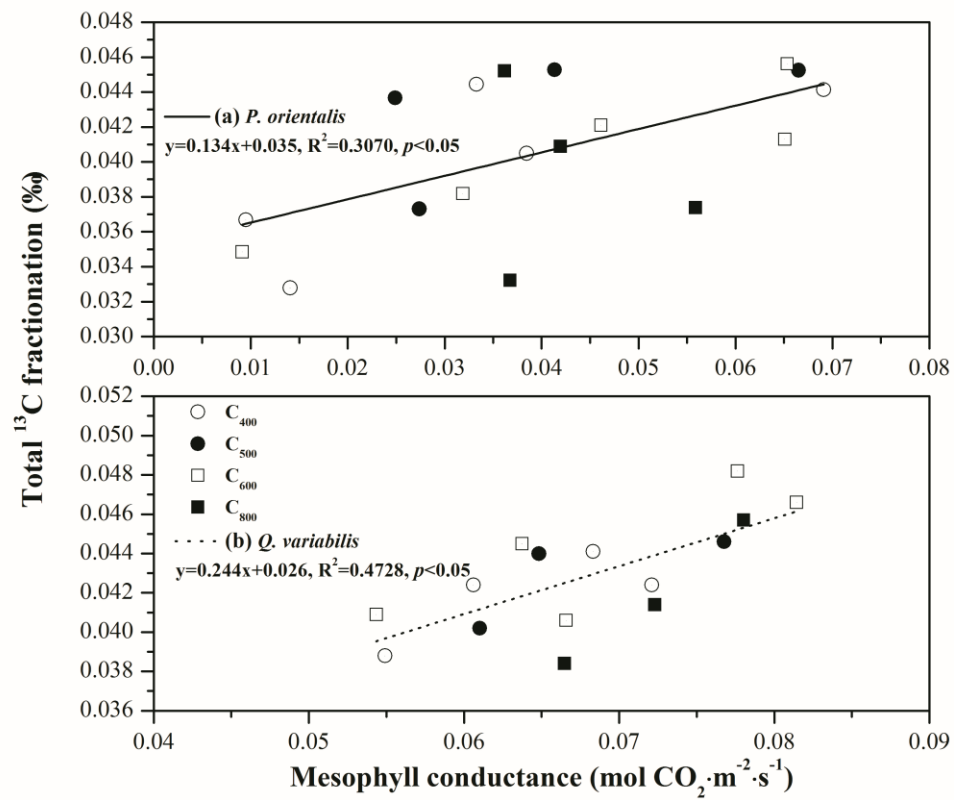

**Figure 8.** Regression between mesophyll conductance and total  $^{13}\text{C}$  fractionation of *P. orientalis* and *Q. variabilis* under four  $\text{CO}_2$  concentrations.  $\times$  five soil volumetric water contents are established in Figs. 8a and 8b.  $p=0.05$ ,  $n = 32$ .

Table

**Table 1.**  $^{13}\text{C}$  fractionation of *P. orientalis* and *Q. variabilis* under four  $\text{CO}_2$  concentrations  $\times$  five soil volumetric water contents.

| Species              | SWC<br>(of FC) | CO <sub>2</sub> concentration (ppm)           |        |        |        |               |                          |                 |        |        |               |                         |        |        |        |        |
|----------------------|----------------|-----------------------------------------------|--------|--------|--------|---------------|--------------------------|-----------------|--------|--------|---------------|-------------------------|--------|--------|--------|--------|
|                      |                | <sup>13</sup> C                               |        |        |        |               |                          | <sup>13</sup> C |        |        |               |                         |        |        |        |        |
|                      |                | 400                                           | 500    | 600    | 800    | fractionation | 400                      | 500             | 600    | 800    | fractionation | 400                     | 500    | 600    | 800    |        |
|                      |                | (‰)                                           |        |        |        |               |                          | (‰)             |        |        |               |                         |        |        |        |        |
| <i>P. orientalis</i> | 35%–45%        | Total <sup>13</sup> C<br>fractionation<br>(‰) | 0.0328 | 0.0373 | 0.0349 | 0.0332        | Mesophyll<br>conductance | 0.0081          | 0.0030 | 0.0034 | 0.0072        | Post-<br>photosynthesis | 0.0247 | 0.0343 | 0.0315 | 0.0260 |
|                      | 50%–60%        |                                               | 0.0367 | 0.0437 | 0.0382 | 0.0374        |                          | 0.0018          | 0.0058 | 0.0094 | 0.0004        |                         | 0.0349 | 0.0379 | 0.0288 | 0.0370 |
|                      | 60%–70%        |                                               | 0.0405 | 0.0366 | 0.0421 | 0.0409        |                          | 0.0018          | 0.0050 | 0.0026 | 0.0007        |                         | 0.0387 | 0.0316 | 0.0395 | 0.0402 |
|                      | 70%–80%        |                                               | 0.0444 | 0.0453 | 0.0413 | 0.0452        |                          | 0.0044          | 0.0052 | 0.0103 | 0.0013        |                         | 0.0400 | 0.0401 | 0.0310 | 0.0439 |
|                      | 100%           |                                               | 0.0441 | 0.0453 | 0.0456 | 0.0472        |                          | 0.0057          | 0.0040 | 0.0025 | 0.0039        |                         | 0.0384 | 0.0413 | 0.0431 | 0.0433 |
| <i>Q. variabilis</i> | 35%–45%        |                                               | 0.0388 | 0.0402 | 0.0406 | 0.0384        |                          | 0.0007          | 0.0025 | 0.0006 | 0.0091        |                         | 0.0381 | 0.0377 | 0.0400 | 0.0293 |
|                      | 50%–60%        |                                               | 0.0433 | 0.0448 | 0.0409 | 0.0368        |                          | 0.0061          | 0.0084 | 0.0023 | 0.0018        |                         | 0.0372 | 0.0364 | 0.0386 | 0.0350 |
|                      | 60%–70%        |                                               | 0.0424 | 0.0440 | 0.0445 | 0.0414        |                          | 0.0066          | 0.0086 | 0.0078 | 0.0041        |                         | 0.0358 | 0.0354 | 0.0367 | 0.0373 |
|                      | 70%–80%        |                                               | 0.0424 | 0.0446 | 0.0482 | 0.0457        |                          | 0.0034          | 0.0016 | 0.0074 | 0.0028        |                         | 0.0390 | 0.0430 | 0.0408 | 0.0429 |
|                      | 100%           |                                               | 0.0441 | 0.0466 | 0.0466 | 0.0398        |                          | 0.0027          | 0.0076 | 0.0022 | 0.0125        |                         | 0.0414 | 0.0390 | 0.0444 | 0.0273 |
